# Supplementary material
Source: PubMed Central journal article supplement (PMC7902451)
Supplement: NIHMS1649519-supplement-1.pdf [file NIHMS1649519-supplement-1.pdf]

# Supporting Information

## Decorin Regulates Cartilage Pericellular Matrix Micromechanobiology

*Daphney R. Chery<sup>a</sup>, Biao Han<sup>a</sup>, Ying Zhou<sup>b</sup>, Chao Wang<sup>a</sup>, Sheila M. Adams<sup>c</sup>,  
Prashant Chandrasekaran<sup>a</sup>, Bryan Kwok<sup>a</sup>, Su-Jin Heo<sup>d,e</sup>, Motomi Enomoto-Iwamoto<sup>f</sup>, X. Lucas Lu<sup>g</sup>,  
Dehan Kong<sup>b</sup>, Renato V. Iozzo<sup>h</sup>, David E. Birk<sup>c</sup>, Robert L. Mauck<sup>d,e</sup>, and Lin Han<sup>a,\*</sup>*

<sup>a</sup>School of Biomedical Engineering, Science and Health Systems, Drexel University,  
Philadelphia, PA 19104, United States

<sup>b</sup>Department of Statistical Sciences, University of Toronto, Toronto, ON M5S 3G3, Canada

<sup>c</sup>Department of Molecular Pharmacology and Physiology, Morsani School of Medicine,  
University of South Florida, Tampa, FL 33612, United States

<sup>d</sup>McKay Orthopaedic Research Laboratory, Department of Orthopaedic Surgery, Perelman School of  
Medicine, University of Pennsylvania, Philadelphia, PA 19104, United States

<sup>e</sup>Translational Musculoskeletal Research Center, Corporal Michael J. Crescenz Veterans Administration  
Medical Center, Philadelphia, PA 19104, United States

<sup>f</sup>Department of Orthopaedics, School of Medicine, University of Maryland,  
Baltimore, MD 21201, United States

<sup>g</sup>Department of Mechanical Engineering, University of Delaware,  
Newark, DE 19716, United States

<sup>h</sup>Department of Pathology, Anatomy, and Cell Biology, Sidney Kimmel Medical College,  
Thomas Jefferson University, Philadelphia, PA 19107, United States

\*Correspondence and requests for materials should be addressed to:

Dr. Lin Han

Phone: (215)571-3821

Fax: (215)895-4983

Email: [lh535@drexel.edu](mailto:lh535@drexel.edu).

**Table S1.** Summary of averaged values and statistical analysis outcomes of the thickness of PCM, as well as the area proportions of cell, PCM and T/IT-ECM domains, between wild-type (WT) and decorin-null (*Dcn*<sup>-/-</sup>) cartilage, shown as mean ± 95% CI from values averaged by each animal

|                            | PCM Thickness (µm) |                    |                     | Cell Area (%)     |                    |                     |
|----------------------------|--------------------|--------------------|---------------------|-------------------|--------------------|---------------------|
|                            | 3 days             | 2 weeks            | 3 months            | 3 days            | 2 weeks            | 3 months            |
| WT                         | 3.05 ± 0.18        | 3.10 ± 1.01        | 2.04 ± 0.20         | 32.1 ± 1.8        | 26.2 ± 2.1         | 20.1 ± 1.6          |
| <i>Dcn</i> <sup>-/-</sup>  | 2.96 ± 0.36        | 2.99 ± 0.57        | 2.12 ± 0.52         | 31.1 ± 1.9        | 27.0 ± 1.9         | 20.2 ± 0.6          |
| <i>p</i> -value (genotype) | 1.000              | 0.774              | 1.000               | 1.000             | 1.000              | 0.796               |
|                            | PCM Area (%)       |                    |                     | T/IT-ECM Area (%) |                    |                     |
|                            | 3 days             | 2 weeks            | 3 months            | 3 days            | 2 weeks            | 3 months            |
| WT                         | 32.3 ± 1.8         | 28.5 ± 1.2         | 21.1 ± 1.2          | 35.6 ± 1.2        | 45.3 ± 3.1         | 58.9 ± 1.4          |
| <i>Dcn</i> <sup>-/-</sup>  | 33.9 ± 1.1         | 28.7 ± 1.2         | 22.0 ± 0.8          | 35.0 ± 3.0        | 44.3 ± 2.5         | 57.8 ± 1.2          |
| <i>p</i> -value (genotype) | 1.000              | 0.764              | 0.435               | 0.662             | 1.000              | 0.534               |
| <i>p</i> -value (age)      | PCM Thickness (µm) |                    |                     | Cell Area (%)     |                    |                     |
|                            | 3 days vs 2 weeks  | 3 days vs 3 months | 2 weeks vs 3 months | 3 days vs 2 weeks | 3 days vs 3 months | 2 weeks vs 3 months |
| WT                         | 0.981              | 0.010              | 0.008               | < 0.001           | < 0.0001           | < 0.001             |
| <i>Dcn</i> <sup>-/-</sup>  | 0.990              | 0.009              | 0.008               | 0.003             | < 0.0001           | < 0.0001            |
| <i>p</i> -value (age)      | PCM Area (%)       |                    |                     | T/IT-ECM Area (%) |                    |                     |
|                            | 3 days vs 2 weeks  | 3 days vs 3 months | 2 weeks vs 3 months | 3 days vs 2 weeks | 3 days vs 3 months | 2 weeks vs 3 months |
| WT                         | 0.002              | < 0.0001           | < 0.0001            | < 0.0001          | < 0.0001           | < 0.0001            |
| <i>Dcn</i> <sup>-/-</sup>  | < 0.001            | < 0.0001           | < 0.0001            | < 0.001           | < 0.0001           | < 0.0001            |

**Table S2.** Summary of collagen fibril diameter distributions of 3-month-old wild-type (WT) and decorin-null (*Dcn*<sup>-/-</sup>) cartilage, measured by TEM (data for the territorial and interterritorial domains are adapted from [32])

| unit (nm)                   | Pericellular |                           | Territorial |                           | Interterritorial |                           |
|-----------------------------|--------------|---------------------------|-------------|---------------------------|------------------|---------------------------|
|                             | WT           | <i>Dcn</i> <sup>-/-</sup> | WT          | <i>Dcn</i> <sup>-/-</sup> | WT               | <i>Dcn</i> <sup>-/-</sup> |
| mean                        | 26.1         | 29.0                      | 59.7        | 60.9                      | 67.5             | 69.7                      |
| std                         | 5.8          | 8.0                       | 9.8         | 11.4                      | 13.3             | 18.5                      |
| <i>Q</i> <sub>1</sub>       | 22.0         | 23.2                      | 52.5        | 53.3                      | 58.4             | 56.7                      |
| <i>Q</i> <sub>2</sub>       | 25.8         | 28.3                      | 60.1        | 60.1                      | 65.6             | 67.7                      |
| <i>Q</i> <sub>3</sub>       | 29.7         | 34.0                      | 67.2        | 69.5                      | 74.8             | 81.7                      |
| min                         | 10.7         | 6.5                       | 32.5        | 30.1                      | 32.7             | 32.3                      |
| max                         | 49.9         | 59.6                      | 85.0        | 87.9                      | 119.0            | 124.1                     |
| <i>n</i> <sub>fibrils</sub> | 1,420        | 1,402                     | 213         | 385                       | 218              | 253                       |
| <i>p</i> -value (mean)      | < 0.0001     |                           | 0.225       |                           | 0.145            |                           |
| <i>p</i> -value (variance)  | < 0.0001     |                           | 0.015       |                           | < 0.0001         |                           |

**Table S3.** Summary of averaged values and statistical analysis outcomes of the micromodulus,  $E_{ind}$ , between wild-type (WT) and decorin-null ( $Dcn^{-/-}$ ) cartilage, shown as mean  $\pm$  95% CI from values averaged by each animal

| $E_{ind}$<br>(MPa)            | PCM                  |                       |                        | T/IT-ECM             |                       |                        |
|-------------------------------|----------------------|-----------------------|------------------------|----------------------|-----------------------|------------------------|
|                               | 3 days               | 2 weeks               | 3 months               | 3 days               | 2 weeks               | 3 months               |
| WT                            | 0.058 $\pm$ 0.005    | 0.285 $\pm$ 0.019     | 0.907 $\pm$ 0.057      | 0.105 $\pm$ 0.038    | 0.438 $\pm$ 0.033     | 1.544 $\pm$ 0.097      |
| $Dcn^{-/-}$                   | 0.059 $\pm$ 0.018    | 0.212 $\pm$ 0.048     | 0.252 $\pm$ 0.072      | 0.096 $\pm$ 0.018    | 0.338 $\pm$ 0.039     | 0.438 $\pm$ 0.036      |
| <i>p</i> -value<br>(genotype) | 0.974                | 0.001                 | < 0.0001               | 0.737                | < 0.001               | < 0.0001               |
| <i>p</i> -value<br>(age)      | PCM                  |                       |                        | T/IT-ECM             |                       |                        |
|                               | 3 days vs<br>2 weeks | 3 days vs<br>3 months | 2 weeks vs<br>3 months | 3 days vs<br>2 weeks | 3 days vs<br>3 months | 2 weeks vs<br>3 months |
| WT                            | < 0.0001             | < 0.0001              | < 0.0001               | < 0.0001             | < 0.0001              | < 0.0001               |
| $Dcn^{-/-}$                   | < 0.0001             | < 0.0001              | 0.167                  | < 0.0001             | < 0.0001              | < 0.001                |
| <i>p</i> -value<br>(region)   | WT                   |                       |                        | $Dcn^{-/-}$          |                       |                        |
|                               | 3 days               | 2 weeks               | 3 months               | 3 days               | 2 weeks               | 3 months               |
| PCM vs<br>T/IT-ECM            | 0.020                | < 0.0001              | < 0.001                | 0.005                | 0.002                 | 0.006                  |

**Table S4.** Summary of averaged values and statistical analysis outcomes of  $[Ca^{2+}]_i$  parameters between wild-type (WT) and decorin-null ( $Dcn^{-/-}$ ) cartilage chondrocytes at all three tested ages, shown as mean  $\pm$  95% CI from the values averaged by cells

| % $R_{cell}$        | Hypotonic       |                 |                 | Isotonic        |                 |                 | Hypertonic      |                 |                 |
|---------------------|-----------------|-----------------|-----------------|-----------------|-----------------|-----------------|-----------------|-----------------|-----------------|
|                     | 3 days          | 2 weeks         | 3 months        | 3 days          | 2 weeks         | 3 months        | 3 days          | 2 weeks         | 3 months        |
| WT                  | 81 $\pm$ 10     | 81 $\pm$ 10     | 75 $\pm$ 9      | 71 $\pm$ 10     | 70 $\pm$ 12     | 59 $\pm$ 10     | 51 $\pm$ 11     | 50 $\pm$ 11     | 44 $\pm$ 10     |
| $Dcn^{-/-}$         | 80 $\pm$ 9      | 68 $\pm$ 11     | 42 $\pm$ 8      | 71 $\pm$ 11     | 48 $\pm$ 10     | 33 $\pm$ 7      | 51 $\pm$ 10     | 32 $\pm$ 8      | 22 $\pm$ 6      |
| <i>p</i> -value     | 0.993           | 0.330           | < 0.001         | 1.000           | 0.029           | 0.001           | 1.000           | 0.030           | 0.002           |
| $n_{peak}$          | Hypotonic       |                 |                 | Isotonic        |                 |                 | Hypertonic      |                 |                 |
|                     | 3 days          | 2 weeks         | 3 months        | 3 days          | 2 weeks         | 3 months        | 3 days          | 2 weeks         | 3 months        |
| WT                  | 7.78 $\pm$ 0.29 | 6.66 $\pm$ 0.24 | 6.15 $\pm$ 0.32 | 5.25 $\pm$ 0.20 | 4.53 $\pm$ 0.28 | 3.60 $\pm$ 0.19 | 3.11 $\pm$ 0.21 | 2.42 $\pm$ 0.19 | 2.05 $\pm$ 0.22 |
| $Dcn^{-/-}$         | 7.80 $\pm$ 0.24 | 4.06 $\pm$ 0.25 | 2.54 $\pm$ 0.13 | 5.22 $\pm$ 0.19 | 2.91 $\pm$ 0.18 | 1.78 $\pm$ 0.19 | 3.04 $\pm$ 0.18 | 1.98 $\pm$ 0.22 | 1.19 $\pm$ 0.12 |
| <i>p</i> -value     | 0.977           | < 0.0001        | < 0.0001        | 1.000           | 0.001           | < 0.0001        | 1.000           | 0.651           | 0.009           |
| $t_{peak}$<br>(sec) | Hypotonic       |                 |                 | Isotonic        |                 |                 | Hypertonic      |                 |                 |
|                     | 3 days          | 2 weeks         | 3 months        | 3 days          | 2 weeks         | 3 months        | 3 days          | 2 weeks         | 3 months        |
| WT                  | 18.2 $\pm$ 0.6  | 20.9 $\pm$ 0.8  | 21.7 $\pm$ 0.5  | 25.9 $\pm$ 0.7  | 27.3 $\pm$ 0.8  | 29.0 $\pm$ 0.9  | 50.4 $\pm$ 1.5  | 50.2 $\pm$ 1.6  | 54.3 $\pm$ 1.5  |
| $Dcn^{-/-}$         | 18.4 $\pm$ 0.6  | 30.7 $\pm$ 1.0  | 49.9 $\pm$ 1.6  | 26.4 $\pm$ 0.6  | 34.9 $\pm$ 1.4  | 68.1 $\pm$ 1.7  | 50.9 $\pm$ 1.3  | 66.3 $\pm$ 2.0  | 84.7 $\pm$ 2.5  |
| <i>p</i> -value     | 0.740           | < 0.001         | < 0.0001        | 1.000           | 0.002           | < 0.0001        | 1.000           | < 0.0001        | < 0.0001        |

**Table S5.** Summary of statistical analysis outcomes of  $[Ca^{2+}]_i$  parameters among the three tested ages for wild-type (WT) and decorin-null ( $Dcn^{-/-}$ ) cartilage chondrocytes

| % $R_{cell}$ | Hypotonic         |                    |                     | Isotonic          |                    |                     | Hypertonic        |                    |                     |
|--------------|-------------------|--------------------|---------------------|-------------------|--------------------|---------------------|-------------------|--------------------|---------------------|
|              | 3 days vs 2 weeks | 3 days vs 3 months | 2 weeks vs 3 months | 3 days vs 2 weeks | 3 days vs 3 months | 2 weeks vs 3 months | 3 days vs 2 weeks | 3 days vs 3 months | 2 weeks vs 3 months |
| WT           | 0.599 (not sig.)  |                    |                     | 0.551 (not sig.)  |                    |                     | 1.000 (not sig.)  |                    |                     |
| $Dcn^{-/-}$  | 0.163             | < 0.0001           | 0.001               | 0.009             | < 0.0001           | 0.043               | 0.009             | < 0.0001           | 0.091               |
| $n_{peak}$   | Hypotonic         |                    |                     | Isotonic          |                    |                     | Hypertonic        |                    |                     |
|              | 3 days vs 2 weeks | 3 days vs 3 months | 2 weeks vs 3 months | 3 days vs 2 weeks | 3 days vs 3 months | 2 weeks vs 3 months | 3 days vs 2 weeks | 3 days vs 3 months | 2 weeks vs 3 months |
| WT           | 0.084             | 0.002              | 0.530               | 0.240             | < 0.001            | 0.058               | 0.127             | 0.006              | 0.475               |
| $Dcn^{-/-}$  | < 0.0001          | < 0.0001           | < 0.001             | < 0.0001          | < 0.0001           | < 0.001             | 0.004             | < 0.0001           | 0.008               |
| $t_{peak}$   | Hypotonic         |                    |                     | Isotonic          |                    |                     | Hypertonic        |                    |                     |
|              | 3 days vs 2 weeks | 3 days vs 3 months | 2 weeks vs 3 months | 3 days vs 2 weeks | 3 days vs 3 months | 2 weeks vs 3 months | 3 days vs 2 weeks | 3 days vs 3 months | 2 weeks vs 3 months |
| WT           | 0.001             | < 0.001            | 0.267               | 0.191             | 0.006              | 0.111               | 0.975             | 0.018              | 0.013               |
| $Dcn^{-/-}$  | < 0.0001          | < 0.0001           | < 0.0001            | < 0.0001          | < 0.0001           | < 0.0001            | < 0.001           | < 0.0001           | < 0.0001            |

**Table S6.** Summary of statistical analysis outcomes of  $[Ca^{2+}]_i$  parameters among osmolarity conditions for wild-type (WT) and decorin-null ( $Dcn^{-/-}$ ) cartilage chondrocytes at all three tested ages

| % $R_{cell}$ | 3 days      |               |              | 2 weeks     |               |              | 3 months    |               |              |
|--------------|-------------|---------------|--------------|-------------|---------------|--------------|-------------|---------------|--------------|
|              | Hypo vs Iso | Hypo vs Hyper | Iso vs Hyper | Hypo vs Iso | Hypo vs Hyper | Iso vs Hyper | Hypo vs Iso | Hypo vs Hyper | Iso vs Hyper |
| WT           | 0.384       | < 0.001       | 0.024        | 0.374       | < 0.001       | 0.036        | 0.067       | < 0.001       | 0.099        |
| $Dcn^{-/-}$  | 0.342       | < 0.001       | 0.022        | 0.030       | < 0.0001      | 0.034        | 0.227       | < 0.001       | 0.043        |
| $n_{peak}$   | 3 days      |               |              | 2 weeks     |               |              | 3 months    |               |              |
|              | Hypo vs Iso | Hypo vs Hyper | Iso vs Hyper | Hypo vs Iso | Hypo vs Hyper | Iso vs Hyper | Hypo vs Iso | Hypo vs Hyper | Iso vs Hyper |
| WT           | < 0.0001    | < 0.0001      | < 0.0001     | < 0.0001    | < 0.0001      | < 0.0001     | < 0.0001    | < 0.0001      | < 0.0001     |
| $Dcn^{-/-}$  | < 0.0001    | < 0.0001      | < 0.0001     | 0.008       | < 0.0001      | 0.014        | < 0.0001    | < 0.0001      | < 0.0001     |
| $t_{peak}$   | 3 days      |               |              | 2 weeks     |               |              | 3 months    |               |              |
|              | Hypo vs Iso | Hypo vs Hyper | Iso vs Hyper | Hypo vs Iso | Hypo vs Hyper | Iso vs Hyper | Hypo vs Iso | Hypo vs Hyper | Iso vs Hyper |
| WT           | < 0.001     | < 0.0001      | < 0.0001     | < 0.001     | < 0.0001      | < 0.0001     | < 0.001     | < 0.0001      | < 0.0001     |
| $Dcn^{-/-}$  | < 0.001     | < 0.0001      | < 0.0001     | 0.057       | < 0.0001      | < 0.0001     | < 0.001     | < 0.0001      | < 0.0001     |

**Table S7.** Summary of averaged values and statistical analysis outcomes of  $[Ca^{2+}]_i$  parameters between genotype and treatment conditions (untreated versus chondroitinase ABC, or C'ABC) for 2-week-old wild-type (WT) and decorin-null ( $Dcn^{-/-}$ ) cartilage chondrocytes, shown as mean  $\pm$  95% CI from the values averaged by cells

| %R <sub>cell</sub>         | Hypotonic       |                 |         | Isotonic        |                 |          | Hypertonic      |                 |          |
|----------------------------|-----------------|-----------------|---------|-----------------|-----------------|----------|-----------------|-----------------|----------|
|                            | Untreated       | C'ABC           | p-value | Untreated       | C'ABC           | p-value  | Untreated       | C'ABC           | p-value  |
| WT                         | 64 $\pm$ 11     | 51 $\pm$ 10     | 0.343   | 51 $\pm$ 11     | 36 $\pm$ 8      | 0.138    | 39 $\pm$ 9      | 27 $\pm$ 6      | 0.127    |
| $Dcn^{-/-}$                | 50 $\pm$ 10     | 41 $\pm$ 9      | 0.517   | 39 $\pm$ 9      | 31 $\pm$ 8      | 0.373    | 25 $\pm$ 6      | 20 $\pm$ 5      | 0.260    |
| p-value                    | 0.305           | 0.266           |         | 0.327           | 0.378           |          | 0.040           | 0.341           |          |
| n <sub>peak</sub>          | Hypotonic       |                 |         | Isotonic        |                 |          | Hypertonic      |                 |          |
|                            | Untreated       | C'ABC           | p-value | Untreated       | C'ABC           | p-value  | Untreated       | C'ABC           | p-value  |
| WT                         | 5.06 $\pm$ 0.22 | 3.87 $\pm$ 0.19 | 0.019   | 4.02 $\pm$ 0.24 | 2.51 $\pm$ 0.18 | 0.001    | 2.07 $\pm$ 0.24 | 1.57 $\pm$ 0.18 | 0.075    |
| $Dcn^{-/-}$                | 4.04 $\pm$ 0.17 | 2.67 $\pm$ 0.20 | 0.002   | 3.17 $\pm$ 0.18 | 1.78 $\pm$ 0.20 | < 0.001  | 1.68 $\pm$ 0.16 | 1.18 $\pm$ 0.13 | 0.086    |
| p-value                    | 0.078           | 0.010           |         | 0.093           | 0.076           |          | 0.176           | 0.207           |          |
| t <sub>peak</sub><br>(sec) | Hypotonic       |                 |         | Isotonic        |                 |          | Hypertonic      |                 |          |
|                            | Untreated       | C'ABC           | p-value | Untreated       | C'ABC           | p-value  | Untreated       | C'ABC           | p-value  |
| WT                         | 24.5 $\pm$ 0.7  | 36.8 $\pm$ 0.9  | < 0.001 | 35.4 $\pm$ 1.2  | 52.4 $\pm$ 1.6  | < 0.0001 | 50.9 $\pm$ 1.5  | 65.4 $\pm$ 1.3  | < 0.0001 |
| $Dcn^{-/-}$                | 35.8 $\pm$ 0.8  | 46.2 $\pm$ 1.6  | 0.002   | 44.3 $\pm$ 1.3  | 65.9 $\pm$ 1.4  | < 0.0001 | 65.1 $\pm$ 1.5  | 81.4 $\pm$ 1.6  | 0.002    |
| p-value                    | < 0.001         | < 0.001         |         | < 0.001         | < 0.0001        |          | < 0.001         | < 0.0001        |          |

**Table S8.** Summary of statistical analysis outcomes of  $[Ca^{2+}]_i$  parameters among osmolarity conditions for 2-week-old wild-type (WT) and decorin-null ( $Dcn^{-/-}$ ) cartilage chondrocytes at each genotype and each treatment condition (untreated versus chondroitinase ABC, or C'ABC)

| %R <sub>cell</sub> | Untreated   |               |              | C'ABC       |               |              |
|--------------------|-------------|---------------|--------------|-------------|---------------|--------------|
|                    | Hypo vs Iso | Hypo vs Hyper | Iso vs Hyper | Hypo vs Iso | Hypo vs Hyper | Iso vs Hyper |
| WT                 | 0.183       | 0.003         | 0.257        | 0.057       | < 0.001       | 0.186        |
| $Dcn^{-/-}$        | 0.208       | < 0.001       | 0.025        | 0.240       | < 0.001       | 0.048        |
| n <sub>peak</sub>  | Untreated   |               |              | C'ABC       |               |              |
|                    | Hypo vs Iso | Hypo vs Hyper | Iso vs Hyper | Hypo vs Iso | Hypo vs Hyper | Iso vs Hyper |
| WT                 | 0.051       | < 0.0001      | < 0.0001     | < 0.001     | < 0.0001      | 0.004        |
| $Dcn^{-/-}$        | 0.066       | < 0.0001      | < 0.0001     | 0.014       | < 0.0001      | 0.052        |
| t <sub>peak</sub>  | Untreated   |               |              | C'ABC       |               |              |
|                    | Hypo vs Iso | Hypo vs Hyper | Iso vs Hyper | Hypo vs Iso | Hypo vs Hyper | Iso vs Hyper |
| WT                 | < 0.0001    | < 0.0001      | < 0.0001     | < 0.0001    | < 0.0001      | < 0.0001     |
| $Dcn^{-/-}$        | 0.003       | < 0.0001      | < 0.0001     | < 0.0001    | < 0.0001      | < 0.0001     |
